# Supplementary material for: FOXM1 recruits nuclear Aurora kinase A to participate in a positive feedback loop essential for the self-renewal of breast cancer stem cells
Source: PubMed Central journal article supplement (PMC5485180; doi:10.1038/onc.2016.490), 2017-01-23
Supplement: onc2016490x2.pdf [file onc2016490x2.pdf]

**Supplementary Table S1.****FOXM1**

| <b>Variables</b>      | <b>High expression</b> | <b>Low expression</b> | <b>Total</b> | <b>P Value</b> |
|-----------------------|------------------------|-----------------------|--------------|----------------|
| Age                   |                        |                       |              |                |
| <60 years             | 89                     | 73                    | 162          | 0.56923        |
| ≥60 years             | 55                     | 52                    | 107          |                |
| Lymph node metastasis |                        |                       |              |                |
| Negative              | 45                     | 64                    | 109          | 0.00088        |
| Positive              | 99                     | 61                    | 160          |                |
| Tumour grade          |                        |                       |              |                |
| 1                     | 38                     | 31                    | 69           | 0.40023        |
| 2                     | 55                     | 40                    | 95           |                |
| 3                     | 51                     | 54                    | 105          |                |

**Aurora kinase A (AURKA)**

| <b>Variables</b>      | <b>High expression</b> | <b>Low expression</b> | <b>Total</b> | <b>P Value</b> |
|-----------------------|------------------------|-----------------------|--------------|----------------|
| Age                   |                        |                       |              |                |
| <60 years             | 110                    | 52                    | 162          | 0.70413        |
| ≥60 years             | 75                     | 32                    | 107          |                |
| Lymph node metastasis |                        |                       |              |                |
| Negative              | 65                     | 44                    | 109          | 0.00758        |
| Positive              | 120                    | 40                    | 160          |                |
| Tumour grade          |                        |                       |              |                |
| 1                     | 45                     | 24                    | 69           | 0.75211        |
| 2                     | 67                     | 28                    | 95           |                |
| 3                     | 73                     | 32                    | 105          |                |
