# Supplementary material for: FOXM1 recruits nuclear Aurora kinase A to participate in a positive feedback loop essential for the self-renewal of breast cancer stem cells
Source: PubMed Central journal article supplement (PMC5485180; doi:10.1038/onc.2016.490), 2017-01-23
Supplement: onc2016490x3.pdf [file onc2016490x3.pdf]

**Table S2. Primers used in this study.**

| Name                              | Sense primer (5' to 3')       | Anti-sense primer (5' to 3')     | Application                                               |
|-----------------------------------|-------------------------------|----------------------------------|-----------------------------------------------------------|
| AURKA mRNA RTq-PCR                | TGGAATATGCACCACTTGGGA         | ACTGACCACCCAAAATCTGC             | Real-Time PCR for AURKA mRNA                              |
| AURKA-promoter (-1507/+126)       | ATGGTACCACCAGGGAAGATTAACCTCG  | ATACGCGTACACTCAGGGACGGAGGAAAURKA | promoter luciferase repertor construction                 |
| AURKA-promoter (-2047/+126)       | ATGGTACCAAGTGCTGGGATTACGGG    | ATACGCGTACACTCAGGGACGGAGGAAAURKA | promoter luciferase repertor construction                 |
| AURKA-promoter (-28/+126)         | ATGGTACCAAGGCGTCGGGTTTGTG     | ATACGCGTACACTCAGGGACGGAGGAAAURKA | promoter luciferase repertor construction                 |
| AURKA-promoter (-968/+126)        | ATGGTACCCTGGAAGGATGGAGGGAA    | ATACGCGTACACTCAGGGACGGAGGAAAURKA | promoter luciferase repertor construction                 |
| AURKA-promoter FKHR mutant        | CACTCGCCAGGTAGGGAGAAGCCTAA    | TTAGGCTTCTCCCTACCTGGCGAGTG       | FOXM1 binding motif mutant of AURKA promoter              |
| ChIP-1 (-47/+98) FOXM1            | GATTGGCGACGTTCCGTCA           | TGGGAACCCCGGGGGATCC              | ChIP/ReChIP Real-Time PCR (AURKA binds to FOXM1 promoter) |
| ChIP-2 (-769/-763) AURKA          | GTGGCCACCCCTAATTCT            | GTCCTCGTGTGCTCACCTGC             | ChIP Real-Time PCR (FOXM1 binds to AURKA promoter)        |
| ChIP-ctrl-1 (-2756/-2651) FOXM1   | CCTATGCGTATCAACATC            | AGAGTGAGAACAGCTCCA               | ChIP/ReChIP Real-Time PCR (AURKA binds to FOXM1 promoter) |
| ChIP-ctrl-2 (-2047/-1912) (AURKA) | AAAGTGCTGGGATTACGGGC          | TTAGCATGACGGTATCTGGCATG          | ChIP Real-Time PCR (FOXM1 binds to AURKA promoter)        |
| FOXM1 cDNA                        | ATGGATCCGCCACCATGAAAAGTAGCCCA | ATTCTAGACTACTTATCGTCGTCATCCT     | FOXM1 overexpression plasmid construction                 |
| FOXM1 mRNA RTq-PCR                | ATACGTGGATTGAGGACCACT         | TCCAATGTCAAGTAGCGGTTG            | Real-Time PCR for FOXM1 mRNA                              |
| FOXM1-promoter (+18/+1034)        | ACTGAAAGCTCCGGTGCCA           | CGACGCGTCGTTACGGAACCTTTGGAA      | FOXM1 promoter luciferase repertor construction           |
| FOXM1-promoter (-1121/+1034)      | CCGCTCGAGCGCCCTTCCCTGTCCTACC  | CGACGCGTCGTTACGGAACCTTTGGAA      | FOXM1 promoter luciferase repertor construction           |
| FOXM1-promoter (-47/+1034)        | CCGCTCGAGCCGGATTGGCGACGTTCC   | CGACGCGTCGTTACGGAACCTTTGGAA      | FOXM1 promoter luciferase repertor construction           |
| FOXM1-promoter FKHR mutant        | GCCAAATTCAGGGAGCGGAACAA       | TTGTTCCGCTCCCTGAAAATTGGC         | FOXM1 binding motif mutant of FOXM1 promoter              |
| GAPDH mRNA RTq-PCR                | ATGGGGAAGGTGAAGGTCGG          | TGGAGGCCATGTGGGCCATG             | Real-Time PCR control                                     |
| shAURKA-1                         | CCGGGGCAACCAGTGTACCTCATCTCGA  | ATTAAGGCAACCAGTGTACCTCATC        | shAURKA-1 plasmid construction                            |
| shAURKA-2                         | CCGGATTCTTCCCAGCGGTTCCCTCGA   | AATTAAGGCAACCAGTGTACCTCATC       | shAURKA-2 plasmid construction                            |
| shFOXM1-1                         | CCGGGGCCCAACAGGAGTCTAATCAACTC | AATTAAGGCAACCAGGAGTCTAATC        | shFOXM1-1 plasmid construction                            |
| shFOXM1-2                         | CCGGGGCCCAATCGTTCTCTGACAGA    | AATTAAGGCAACCAGGAGTCTAATC        | shFOXM1-2 plasmid construction                            |
| siAURKA-1                         | AUGCCCUGUCUUACUGUCA           |                                  | Transient knock down AURKA                                |
| siAURKA-2                         | GGCAACCAGTGTACCTCAT           |                                  | Transient knock down AURKA                                |
| siCtrl                            | UUCUCCGAACGUGUCACGU           |                                  | Transient knock down gene control                         |
| siFOXM1-1                         | GCACTATCAACAATAGCCTAT         |                                  | Transient knock down FOXM1                                |
| siFOXM1-2                         | GCCAATCGTTCTCTGACAGAA         |                                  | Transient knock down FOXM1                                |
