# Supplementary material for: FOXM1 recruits nuclear Aurora kinase A to participate in a positive feedback loop essential for the self-renewal of breast cancer stem cells
Source: PubMed Central journal article supplement (PMC5485180; doi:10.1038/onc.2016.490), 2017-01-23
Supplement: onc2016490x5.pdf [file onc2016490x5.pdf]

**Figure S2**

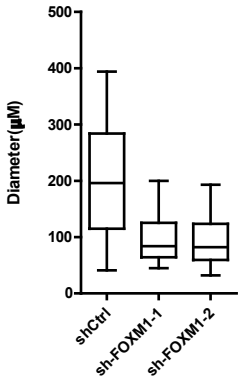

**Figure S2. FOXM1 knockdown decrease the size of individual tumorspheres compared to control in MDA-MB-231 cells.**
