# Supplementary material for: FOXM1 recruits nuclear Aurora kinase A to participate in a positive feedback loop essential for the self-renewal of breast cancer stem cells
Source: PubMed Central journal article supplement (PMC5485180; doi:10.1038/onc.2016.490), 2017-01-23
Supplement: onc2016490x6.pdf [file onc2016490x6.pdf]

**Figure S3**

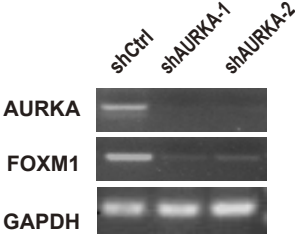

Figure S3. Semi-quantitative RT PCR detects mRNA levels of AURKA and FOXM1 in control (shCtrl) and AURKA (shAURKA) knockdown MDA-MB-231 cells.
