# Supplementary material for: FOXM1 recruits nuclear Aurora kinase A to participate in a positive feedback loop essential for the self-renewal of breast cancer stem cells
Source: PubMed Central journal article supplement (PMC5485180; doi:10.1038/onc.2016.490), 2017-01-23
Supplement: onc2016490x7.pdf [file onc2016490x7.pdf]

Figure S4

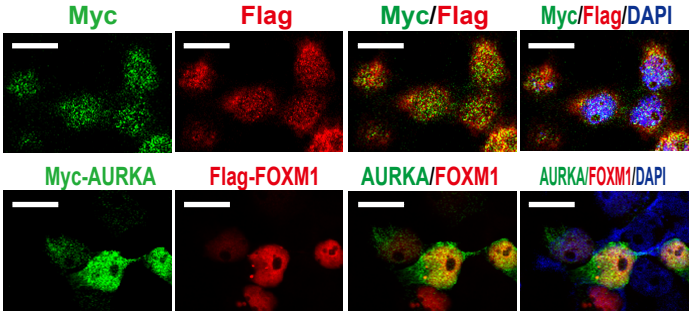

Figure S4. Nuclear AURKA directly binds to FOXM1 to trans-activate FOXM1 expression. Immunofluorescence assay to detect intracellular localization of AURKA and FOXM1. Scale bar, 20  $\mu$ m.
